# Supplementary material for: Macroecological patterns of American Cutaneous Leishmaniasis transmission across the health areas of Panamá (1980–2012)
Source: PubMed Central journal article supplement (PMC5991822; doi:10.1016/j.parepi.2016.03.003), 2016-03-18
Supplement: mmc1.pdf [file mmc1.pdf]

## **Appendix 1**

This appendix contains tables for all the supplementary analyses associated with the article. Briefly, Tables S1, S2 and S3 report results for the principal component analyses used to build different indices that reduced the dimensions of several associated variables. Tables S4 and S5 report results of analyses performed on American Cutaneous Leishmaniasis (ACL) case counts as opposed to the ACL rates reported in the main manuscript. Table S6 reports the non-significant results of the analysis about the relationship between marginalization and American Cutaneous Leishmaniasis rates. Tables S7, S8 and S9 report the factors significantly associated with the abundance of the different dominant sand fly vector species in Panamá. Finally, Tables S10 to S25 report parameter estimates used to build Table 4 in the main article.

**Table S1** Principal Component Analysis for the estimation of a marginalization index. Columns indicate the loadings for each component.

| Year 1990             | Comp.1 | Comp.2 | Comp.3 | Comp.4 |
|-----------------------|--------|--------|--------|--------|
| Mud Walls             | 0.53   | -0.44  | 0.37   | 0.62   |
| Thatched Roofs        | 0.55   | 0.71   | 0.39   | -0.20  |
| Earthen Floors        | 0.53   | -0.48  | -0.21  | -0.66  |
| Access to Piped Water | -0.36  | -0.26  | 0.82   | -0.36  |
| % Variance            | 0.86   | 0.07   | 0.05   | 0.02   |
| Cumulative Variance   | 0.86   | 0.93   | 0.98   | 1.00   |
| Year 2000             | Comp.1 | Comp.2 | Comp.3 | Comp.4 |
| Mud Walls             | 0.45   | -0.57  | -0.37  | 0.58   |
| Thatched Roofs        | 0.51   | 0.00   | 0.84   | 0.18   |
| Earthen Floors        | 0.46   | -0.38  | 0.00   | -0.80  |
| Access to Piped Water | -0.57  | -0.73  | 0.39   | 0.00   |
| % Variance            | 0.89   | 0.07   | 0.04   | 0.01   |
| Cumulative Variance   | 0.89   | 0.96   | 0.99   | 1.00   |
| Year 2010             | Comp.1 | Comp.2 | Comp.3 | Comp.4 |
| Mud Walls             | 0.53   | -0.52  | -0.29  | 0.61   |
| Thatched Roofs        | 0.53   | 0.00   | 0.83   | -0.13  |
| Earthen Floors        | 0.50   | -0.11  | -0.44  | -0.74  |
| Access to Piped Water | -0.43  | -0.85  | 0.16   | -0.27  |
| % Variance            | 0.91   | 0.07   | 0.01   | 0.00   |
| Cumulative Variance   | 0.91   | 0.98   | 1.00   | 1.00   |

**Table S2** Principal Component Analysis for the estimation of a climate type index. Columns indicate the loadings for each component.

| Climate Type                             | Com<br>p.1 | Com<br>p.2 | Com<br>p.3 | Com<br>p.4 | Com<br>p.5 | Com<br>p.6 | Com<br>p.7 |
|------------------------------------------|------------|------------|------------|------------|------------|------------|------------|
| Low Mountain Tropical                    | 0.00       | -0.11      | 0.22       | -0.47      | 0.83       | 0.00       | 0.16       |
| Tropical with a long dry season          | 0.00       | 0.96       | -0.17      | 0.00       | 0.18       | 0.00       | 0.00       |
| Sub Equatorial with a dry season         | -0.98      | 0.00       | 0.00       | 0.00       | 0.00       | 0.14       | 0.11       |
| Low Mountain Oceanic                     | 0.00       | 0.00       | 0.26       | 0.75       | 0.33       | -0.50      | 0.00       |
| Tropical Oceanic                         | -0.17      | -0.14      | -0.46      | -0.26      | 0.00       | -0.66      | -0.48      |
| Middle and High Mountain Tropical        | 0.00       | 0.00       | 0.11       | 0.25       | 0.27       | 0.45       | -0.81      |
| Tropical Oceanic with a short dry Season | 0.00       | -0.18      | -0.79      | 0.30       | 0.30       | 0.30       | 0.26       |
| % Variance                               | 0.66       | 0.23       | 0.07       | 0.02       | 0.01       | 0.00       | 0.00       |
| Cumulative Variance                      | 0.66       | 0.89       | 0.96       | 0.99       | 1.00       | 1.00       | 1.00       |

**Table S3** Principal Component Analysis for the estimation of a Life Zone index. Columns indicate the loadings for each component.

| Life Zone              | Comp.1 | Comp.2 | Comp.3 | Comp.4 | Comp.5 | Comp.6 |
|------------------------|--------|--------|--------|--------|--------|--------|
| Humid                  | 0.84   | 0.46   | -0.20  | 0.19   | 0.00   | 0.00   |
| Very Humid             | 0.51   | -0.61  | 0.17   | 0.59   | 0.00   | 0.00   |
| Low Mountain<br>Rainy  | 0.00   | -0.20  | 0.10   | -0.23  | 0.93   | 0.16   |
| Premountain<br>Rainy   | 0.18   | -0.52  | 0.19   | -0.75  | -0.32  | 0.00   |
| Mountain Rainy         | 0.00   | 0.00   | 0.00   | 0.00   | 0.15   | -0.99  |
| Dry                    | 0.00   | 0.33   | 0.94   | 0.00   | 0.00   | 0.00   |
| % Variance             | 0.17   | 0.17   | 0.17   | 0.17   | 0.17   | 0.17   |
| Cumulative<br>Variance | 0.17   | 0.33   | 0.50   | 0.67   | 0.83   | 1.00   |

**Table S4** Parameter estimates for the best model of the average number of American Cutaneous Leishmaniasis (1980-2012) cases as function of environmental factors. This model was selected as best from a full model that also considered the climate type index and temperature as covariates ( $\Delta AIC = -0.32$ )

| Factor                  | Estimate | Std.Error | t-value | Pr(> t )   |
|-------------------------|----------|-----------|---------|------------|
| Intercept               | 3050.79  | 483.34    | 6.31    | 0.000738*  |
| Rainfall                | -2089.30 | 339.52    | -6.15   | 0.000844*  |
| (Rainfall) <sup>2</sup> | 362.70   | 57.77     | 6.28    | 0.0007.59* |
| Life Zone Index         | -116.89  | 55.82     | -2.09   | 0.08       |
| Multiple R-squared      | 0.87     |           |         |            |

\*Statistically significant ( $P < 0.05$ ), (Rainfall)<sup>2</sup> indicates the square value of the rainfall.

**Table S5** Factors associated with the number of American Cutaneous Leishmaniasis cases in each health area of Panamá. For the analysis, we employed, a negative binomial generalized linear models (NB-GLM). Parameter estimates and p-values are based on an Analysis of Deviance (ANODE). In the table, ENSO indicates the different phases of El Niño Southern Oscillation, and overdispersion denotes the NB dispersion parameter. Panel indicates the corresponding panel for the raw case data in Figure S4,

| Panel | Health Area    | ENSO           | Rate Change | Parameter Estimate | S.E. | Z     | P       |
|-------|----------------|----------------|-------------|--------------------|------|-------|---------|
| A     | Bocas del Toro | NON            | 1.00        | -                  | -    | -     | -       |
|       |                | Niño           | 0.90        | -0.11              | 0.11 | -0.98 | 0.33    |
|       |                | Niño+1         | 0.97        | -0.03              | 0.11 | -0.27 | 0.78    |
|       |                | Overdispersion | -           | 15.56              | 3.96 | -     | -       |
| B     | Chiriqui       | NON            | 1.00        | -                  | -    | -     | -       |
|       |                | Niño           | 1.07        | 0.07               | 0.16 | 0.44  | 0.66    |
|       |                | Niño+1         | 1.53        | 0.43               | 0.16 | 2.70  | 0.0060* |
|       |                | Overdispersion | -           | 8.43               | 2.40 | -     | -       |
| C     | Veraguas       | NON            | 1.00        | -                  | -    | -     | -       |
|       |                | Niño           | 1.21        | 0.19               | 0.21 | 0.93  | 0.35    |
|       |                | Niño+1         | 1.71        | 0.54               | 0.21 | 2.60  | 0.0090* |
|       |                | Overdispersion | -           | 4.76               | 1.31 | -     | -       |
| D     | Coclé          | NON            | 1.00        | -                  | -    | -     | -       |
|       |                | Niño           | 1.34        | 0.29               | 0.15 | 1.90  | 0.06    |
|       |                | Niño+1         | 1.40        | 0.33               | 0.15 | 2.20  | 0.0289* |
|       |                | Overdispersion | -           | 8.15               | 2.03 | -     | -       |
| E     | Colón          | NON            | 1.00        | -                  | -    | -     | -       |
|       |                | Niño           |             | 0.00               | 0.14 | -0.03 | 0.98    |
|       |                | Niño+1         |             | -0.14              | 0.14 | -0.99 | 0.32    |
|       |                | Overdispersion | -           | 9.62               | 2.42 | -     | -       |
| F     | Panamá Oeste   | NON            | 1.00        | -                  | -    | -     | -       |
|       |                | Niño           | 1.11        | 0.11               | 0.17 | 0.62  | 0.54    |
|       |                | Niño+1         | 0.60        | -0.51              | 0.18 | -2.90 | 0.004*  |
|       |                | Overdispersion | -           | 7.11               | 1.88 | -     | -       |
| G     | Metropolitana  | NON            | 1.00        | -                  | -    | -     | -       |
|       |                | Niño           | 1.38        | 0.32               | 0.21 | 1.60  | 0.12    |

|   |             |                |      |       |      |       |         |
|---|-------------|----------------|------|-------|------|-------|---------|
|   |             | Niño+1         | 1.39 | 0.33  | 0.21 | 1.60  | 0.11    |
|   |             | Overdispersion | -    | 4.64  | 1.18 | -     | -       |
| H | Panamá Este | NON            | 1.00 | -     | -    | -     | -       |
|   |             | Niño           | 1.18 | 0.17  | 0.28 | 0.60  | 0.55    |
|   |             | Niño+1         | 1.21 | 0.19  | 0.28 | 0.69  | 0.49    |
|   |             | Overdispersion | -    | 2.83  |      | -     | -       |
| I | Guna Yala   | NON            | 1.00 | -     | -    | -     | -       |
|   |             | Niño           | 0.49 | -0.72 | 0.19 | -3.70 | >0.001* |
|   |             | Niño+1         | 0.80 | -0.22 | 0.16 | -1.40 | 0.17    |
|   |             | Overdispersion | -    | -     | -    | -     | -       |
| J | Darién      | NON            | 1.00 | -     | -    | -     | -       |
|   |             | Niño           | 0.83 | -0.19 | 0.24 | -0.77 | 0.44    |
|   |             | Niño+1         | 0.64 | -0.45 | 0.24 | -1.80 | 0.07    |
|   |             | Overdispersion | -    | 3.63  | 1.00 | -     | -       |

Panel indicates the panel in Figure 4. NON = Non El Niño, Niño = a year with an El Niño event, Niño +1 = the year following an El Niño event. \*Statistically significant (P<0.05)

**Table S6** Parameter estimates for a model of American Cutaneous Leishmaniasis incidence as function of socio-economic marginalization.

| Factor               | Estimate | Std.Error | t-value | 95% CL        |
|----------------------|----------|-----------|---------|---------------|
| Intercept            | 1.79     | 0.36      | 4.98    | 1.050, 2.527* |
| Variance Health Area | 1.16     |           |         |               |
| Variance Error       | 0.39     |           |         |               |

\*Statistically significant (P<0.05)



**Table S7** Factors associated with *Lutzomyia trapidoi* abundance in the different health areas of Panamá. For the analysis, we employed, as default, log transformed linear mixed effects models (LMM). However, when there was no health area variability, we employed a linear model (LM). In the table for LMMs we present likelihood ratio test estimates (LRT) and the p-values are based on a Chi square test. For LMs we report the F-Values and P-values are based on a F-test. For explanation about factors and labels, please refer to the main text.

| Health Area    | Factor      | Levels                               | DF | F value | Pr(>F)   |
|----------------|-------------|--------------------------------------|----|---------|----------|
| Bocas del Toro | Environment | Per,For                              | 1  | 4.73    | <0.05    |
|                | Quarter     | All                                  | 3  | 1.30    | 0.32     |
| Veraguas       | Quarter     | First,Second,Fourth                  | 2  | 1.67    | 0.24     |
| Coclé          | Environment | Per,For                              | 1  | 2.92    | 0.09     |
|                | Month       | Jan,Mar,Jul,Aug                      | 3  | 17.92   | <0.0004* |
|                | SST         | All                                  | 2  | 13.13   | <0.001*  |
| Colón          | Environment | Per,For                              | 1  | 3.82    | <0.05    |
|                | Month       | Jan,Feb,Mar,Apr,May,Aug,,Sep,Oct,Nov | 8  | 19.17   | <0.01*   |
|                | SST         | All                                  | 2  | 13.91   | <0.0009* |
| Panamá Oeste   | Environment | All                                  | 2  | 1.68    | 0.43     |
|                | Month       | All                                  | 11 | 51.73   | <0.000   |

|                   |                 |                     |    |         | 1*          |
|-------------------|-----------------|---------------------|----|---------|-------------|
|                   | SST             | All                 | 2  | 1.56    | 0.46        |
|                   |                 |                     | DF | F value | Pr(>F)      |
| Metropolita<br>na | Quarter         | All                 | 3  | 1.65    | 0.26        |
|                   | SST             | Hot,Cold            | 1  | 1.94    | 0.21        |
|                   |                 |                     | DF | LRT     | Pr(Chi<br>) |
| Panamá<br>Este    | Environm<br>ent | Per,For             | 1  | 0.47    | 0.49        |
|                   | Month           | Jan,Feb,Mar,Aug,Sep | 4  | 7.28    | 0.12        |
|                   | SST             | All                 | 2  | 7.88    | <0.01*      |
|                   |                 |                     | DF | F value | Pr(>F)      |
| Darién            | Environm<br>ent | Per,For             | 1  | 0.03    | 0.87        |
|                   | SST             | All                 | 2  | 0.99    | 0.39        |

SST= Sea Surface Temperature, Per= Peridomicile, For= Forest

\*Statistically significant (P<0.05)

**Table S8** Factors associated with *Lutzomyia gomezi* abundance in the different Health Areas of Panamá. For the analysis, we employed, as default, log transformed linear mixed effects models (LMM). However, when there was no health area variability, we employed a linear model (LM). In the table for LMMs we present likelihood ratio test estimates (LRT) and the p-values are based on a Chi square test. For LMs we report the F-Values and P-values are based on a F-test. For explanation about factors and labels, please refer to the main text.

| Health Area    | Factor      | Levels                                      | DF | LRT   | Pr(Chi)      |
|----------------|-------------|---------------------------------------------|----|-------|--------------|
| Bocas del Toro | Environment | Per,For                                     | 1  | 1.56  | 0.21         |
|                | Quarter     | All                                         | 3  | 6.73  | 0.08         |
|                | SST         | All                                         | 2  | 2.56  | 0.28         |
| Veraguas       | Season      | All                                         | 1  | 5.09  | <0.04*       |
|                | SST         | Hot,Cold                                    | 1  | 2.83  | 0.12         |
| Coclé          | Environment | Per,For                                     | 1  | 0.05  | 0.83         |
|                | Month       | Jan,Mar,Jul,Aug                             | 3  | 24.00 | <0.000<br>1* |
|                | SST         | ALL                                         | 2  | 16.56 | <0.000<br>2* |
| Colón          | Environment | For,Per                                     | 1  | 0.05  | 0.83         |
|                | Month       | Jan,Feb,Mar,Apr,<br>May,Aug,Sep,Oct<br>,Nov | 8  | 24.00 | <0.000<br>1* |
|                | SST         | All                                         | 2  | 16.56 | <0.000<br>2* |
| Panamá Oeste   | Environment | All                                         | 2  | 5.34  | 0.07         |
|                | Quarter     | All                                         | 3  | 11.46 | <0.009<br>*  |
|                | SST         | All                                         | 2  | 9.69  | <0.007       |

\*

|                   |             |                                     | DF | F value | Pr(>F)       |
|-------------------|-------------|-------------------------------------|----|---------|--------------|
| Metropolita<br>na | Environment | Per,For                             | 1  | 0.19    | 0.68         |
|                   | Month       | Feb,Mar,Apr,Jul,<br>Aug,Sep,Oct,Nov | 7  | 1.89    | 0.28         |
|                   | SST         | Hot,Cold                            | 1  | 0.45    | 0.54         |
|                   |             |                                     | DF | F value | Pr(>F)       |
| Panamá<br>Este    | Environment | For,Per                             | 1  | 0.46    | 0.51         |
|                   | Month       | Jan,Feb,Mar,Aug,<br>Sep             | 4  | 1.97    | 0.14         |
|                   | SST         | All                                 | 2  | 5.90    | <0.01*       |
|                   |             |                                     | DF | LRT     | Pr(Chi)      |
| Darién            | Environment | For,Per                             | 1  | 1.07    | 0.30         |
|                   | Season      | All                                 | 1  | 26.45   | <0.000<br>1* |
|                   | SST         | All                                 | 2  | 41.72   | <0.000<br>1* |

SST= Sea Surface Temperature, Per= Peridomicile, For= Forest

\*Statistically significant (P<0.05)

**Table S9** Factors associated with *Lutzomyia panamensis* abundance in the different Health Areas of Panamá. For the analysis, we employed, as default, log transformed linear mixed effects models (LMM). However, when there was no health area variability, we employed a linear model (LM). In the table for LMMs we present likelihood ratio test estimates (LRT) and the p-values are based on a Chi square test. For LMs we report the F-Values and P-values are based on a F-test. For explanation about factors and labels, please refer to the main text.

| Health Area    | Factor      | Levels                          | DF | LRT   | Pr(Chi)       |
|----------------|-------------|---------------------------------|----|-------|---------------|
| Bocas del Toro | Environment | Per,For                         | 1  | 1.18  | 0.28          |
|                | Quarter     | All                             | 3  | 8.36  | <0.03*        |
|                | SST         | All                             | 2  | 5.61  | 0.06          |
| Veraguas       | Quarter     | First,Second,Fourth             | 2  | 6.65  | <0.03*        |
| Coclé          | Environment | For,Per                         | 1  | 0.11  | 0.74          |
|                | Month       | Jan,Mar,Jul,Aug                 | 3  | 18.24 | <0.0003*      |
|                | SST         | Hot,Cold                        | 1  | 4.45  | <0.03*        |
| Colón          | Environment | For,Per                         | 1  | 8.04  | 0.00456<br>g* |
|                | Quarter     | All                             | 3  | 33.69 | <0.0001<br>*  |
|                | SST         | All                             | 2  | 48.29 | <0.0001<br>*  |
| Panamá Oeste   | Environment | All                             | 2  | 4.58  | 0.10          |
|                | Month       | All                             | 11 | 53.18 | <0.0001<br>*  |
|                | SST         | All                             | 2  | 11.08 | <0.003*       |
| Metropolitana  | Month       | Feb,Mar,Apr,Jul,Aug<br>,Oct,Nov | 6  | 1.86  | 0.39          |

|             | SST         | Hot,Cold                | 1  | 0.33  | 0.62     |
|-------------|-------------|-------------------------|----|-------|----------|
|             |             |                         | DF | LRT   | Pr(Chi)  |
| Panamá Este | Environment | Per,For                 | 1  | 5.17  | <0.023*  |
|             | Month       | Jan,Feb,Mar,Aug,Se<br>p | 4  | 19.36 | <0.0006* |
|             | SST         | Hot,Cold                | 1  | 6.11  | <0.01*   |

SST= Sea Surface Temperature, Per= Peridomicile, For= Forest

\*Statistically significant (P<0.05)

**Table S10** Factors associated with *Lutzomyia panamensis* abundance in Bocas del Toro. For the analysis, we employed a log transformed linear mixed effects model (LMM). In the table the p-values are based on a Chi square test.

| Facotors       | Estimate | Std. Error | P        |
|----------------|----------|------------|----------|
| Intercept      | 1.93     | 0.89       | <0.05*   |
| Environment    | 1.00     | 1.10       | 0.28     |
| Quarter Fourth | 3.48     | 1.01       | 0.03905* |
| Quarter Second | 1.22     | 1.05       | 0.03905* |
| Quarter Third  | 0.86     | 1.27       | 0.03905* |
| SST Hot        | 2.68     | 0.84       | 0.06     |
| SST Normal     | 4.26     | 1.20       | 0.06     |
| Variance       | 0.83     |            |          |
| Variance Error | 0.91     |            |          |

SST = Sea Surface Temperature

\*Statistically significant (P<0.05)

**Table S11** Factors associated with *Lutzomyia gomezi* abundance in Coclé. For the analysis, we employed a log transformed linear mixed effects model (LMM). In the table, the p-values are based on a Chi square test.

| Facotors              | Estimate | Std. Error | P          |
|-----------------------|----------|------------|------------|
| Intercept Perdomicile | 2.48     | 0.40       | <0.05*     |
| Environment           | 2.57     | 0.52       | 0.83       |
| Month Jan.            | 0.77     | 0.32       | <0.0001*   |
| Month Jul.            | -0.18    | 0.70       | <0.0001*   |
| Month Mar.            | 0.33     | 0.64       | <0.0001*   |
| SST Hot               | 4.21     | 0.50       | 0.0002534* |
| SST Normal            | 2.94     | 0.68       | 0.0002534* |
| Variance              | 0.39     |            |            |
| Variance Error        | 0.39     |            |            |

SST = Sea Surface Temperature

\*Statistically significant (P<0.05)



**Table S12** Factors associated with *Lutzomyia panamensis* abundance in Coclé. For the analysis, we employed a log transformed linear mixed effects model (LMM). In the table, the p-values are based on a Chi square test.

| Facotors                | Estimate | Std. Error | P          |
|-------------------------|----------|------------|------------|
| Intercept               | 3.62     | 0.64       | <0.05      |
| Environment Perdomicile | 3.36     | 0.88       | 0.74       |
| Month Jan.              | 1.39     | 0.45       | 3.922e-4*  |
| Month Jul.              | 1.78     | 0.98       | 3.922e-4*  |
| Month Mar.              | 1.36     | 0.92       | 3.922e-4*  |
| SST Hot                 | 5.00     | 0.72       | 0.0348712* |
| Variance                | 1.12     |            |            |
| Variance Error          | 0.77     |            |            |

SST = Sea Surface Temperature

\*Statistically significant (P<0.05)

**Table S13** Factors associated with *Lutzomyia trapidoi* abundance in Coclé. For the analysis, we employed a log transformed linear mixed effects model (LMM). In the table, the p-values are based on a Chi square test.

| Factors                 | Estimate | Std. Error | P         |
|-------------------------|----------|------------|-----------|
| Intercept               | 2.49     | 0.44       | <0.05     |
| Environment Perdomicile | 1.71     | 0.50       | 0.09      |
| Month Jan.              | 0.66     | 0.45       | 0.000457* |
| Month Jul.              | -1.18    | 0.99       | 0.000457* |
| Month Mar.              | -0.62    | 0.90       | 0.000457* |
| SST Hot                 | 4.93     | 0.71       | 0.001411* |
| SST Normal              | 4.11     | 0.99       | 0.001411* |
| Variance                | 0.25     |            |           |
| Variance Error          | 0.79     |            |           |

SST = Sea Surface Temperature

\*Statistically significant (P<0.05)

**Table S14** Factors associated with *Lutzomyia gomezi* abundance in Colón. For the analysis, we employed a log transformed a linear mixed effects model (LMM). In the table, the p-values are based on a Chi square test.

| Facotors                | Estimate | Std. Error | P        |
|-------------------------|----------|------------|----------|
| Intercept               | 0.06     | 0.46       | >0.05    |
| Environment Perdomicile | 0.88     | 0.37       | 0.06     |
| Month Aug.              | 0.09     | 0.82       | 0.04292* |
| Month Feb.              | 1.02     | 0.65       | 0.04292* |
| Month Jan.              | -0.18    | 0.66       | 0.04292* |
| Month Mar.              | 0.21     | 0.59       | 0.04292* |
| Month May               | -1.34    | 0.60       | 0.04292* |
| Month Nov               | 2.71     | 0.95       | 0.04292* |
| Month Oct.              | 0.66     | 0.46       | 0.04292* |
| Month Sep.              | -0.40    | 0.76       | 0.04292* |
| SST Hot                 | 1.08     | 0.47       | 0.01068* |
| SST Normal              | 1.17     | 0.76       | 0.01068* |
| Variance                | 0.20     |            |          |
| Variance Error          | 0.67     |            |          |

SST = Sea Surface Temperature

\*Statistically significant (P<0.05)

**Table S15** Factors associated with *Lutzomyia panamensis* abundance in Colón. For the analysis, we employed a log transformed linear mixed effects model (LMM). In the table, the p-values are based on a Chi square test.

| Facotors                 | Estimate | Std. Error | P         |
|--------------------------|----------|------------|-----------|
| Intercept                | 2.20     | 0.40       | <0.05     |
| Environment Peridomicile | 0.82     | 0.42       | 0.004569* |
| Quarter Fourth           | 3.45     | 0.42       | <0.0001*  |
| Quarter Second           | 0.30     | 0.53       | <0.0001*  |
| Quarter Third            | 2.18     | 0.28       | <0.0001*  |
| SST Hot                  | 2.94     | 0.39       | <0.0001*  |
| SST Normal               | 5.59     | 0.58       | <0.0001*  |
| Variance                 | 0.35     |            |           |
| Variance Error           | 0.51     |            |           |

SST = Sea Surface Temperature

\*Statistically significant (P<0.05)

**Table S16** Factors associated with *Lutzomyia trapidoi* abundance in Colón. For the analysis, we employed log a transformed linear mixed effects model (LMM). In the table, the p-values are based on a Chi square test.

| Facotors                | Estimate | Std. Error | P          |
|-------------------------|----------|------------|------------|
| Intercept               | 0.33     | 0.49       | >0.05      |
| Environment Perdomicile | -0.49    | 0.43       | 0.05       |
| Month Aug.              | 0.70     | 0.79       | 0.0139737* |
| Month Feb.              | 1.24     | 0.66       | 0.0139737* |
| Month Jan.              | 1.51     | 0.70       | 0.0139737* |
| Month Mar.              | 1.47     | 0.63       | 0.0139737* |
| Month May               | -0.08    | 0.53       | 0.0139737* |
| Month Nov.              | 4.04     | 0.97       | 0.0139737* |
| Month Oct.              | 1.23     | 0.49       | 0.0139737* |
| Month Sep.              | 1.17     | 0.76       | 0.0139737* |
| SST Hot                 | 0.96     | 0.47       | 0.0009515* |
| SST Normal              | 2.44     | 0.76       | 0.0009515* |
| Variance                | 0.33     |            |            |
| Variance Error          | 0.67     |            |            |

SST = Sea Surface Temperature

\*Statistically significant (P<0.05)

**Table S17** Factors associated with *Lutzomyia gomezi* abundance in Darién. For the analysis, we employed a log transformed linear mixed effects model (LMM). In the table, the p-values are based on a Chi square test.

| Facotors                | Estimate | Std. Error | P        |
|-------------------------|----------|------------|----------|
| Intercept               | 0.3758   | 0.3236     | >0.05    |
| Environment Perdomicile | 0.47     | 0.33       | 0.30     |
| Season Rainy            | -1.33    | 0.36       | <0.0001* |
| SST Hot                 | -2.28    | 0.36       | <0.0001* |
| SST Normal              | -1.77    | 0.31       | <0.0001* |
| Variance                | 0.08     |            |          |
| Variance Error          | 0.38     |            |          |

SST = Sea Surface Temperature

\*Statistically significant (P<0.05)

**Table S18** Factors associated with *Lutzomyia gomezi* abundance in Panamá Este. For the analysis, we employed a log transformed linear model (LM). In the table the p-values are based on a t-test.

| Facotors                | Estimate | Std. Error | t-value | Pr(> t )  |
|-------------------------|----------|------------|---------|-----------|
| Intercept               | -1.35    | 1.05       | -1.29   | 0.22      |
| Environment Perdomicile | -0.85    | 0.73       | 0.68    | 0.51      |
| Month Feb.              | 0.01     | 0.90       | 1.51    | 0.15      |
| Month. Jan.             | 1.60     | 1.24       | 2.38    | 0.02838 * |
| Month Mar.              | -0.26    | 1.10       | 0.99    | 0.34      |
| Month Sep.              | 1.31     | 1.11       | 2.39    | 0.02807 * |
| SST Hot                 | 1.23     | 0.83       | 3.13    | 0.00584 * |
| SST Normal              | -0.50    | 1.52       | 0.56    | 0.58      |
| Multiple R-squared      | 1.13     |            |         |           |

SST = Sea Surface Temperature

\*Statistically significant (P<0.05)

**Table S19** Factors associated with *Lutzomyia panamensis* abundance in Panamá Este. For the analysis, we employed a log transformed linear mixed effects model (LMM). In the table, the p-values are based on a Chi square test.

| Facotors                 | Estimate | Std. Error | P         |
|--------------------------|----------|------------|-----------|
| Intercept                | 0.04     | 0.63       | >0.05     |
| Environment Peridomicile | -0.82    | 0.45       | 0.023014* |
| Month Feb.               | 0.88     | 0.49       | 0.000667* |
| Month Jan.               | 1.18     | 0.64       | 0.000667* |
| Month Mar.               | 0.20     | 0.61       | 0.000667* |
| Month Sep.               | 2.57     | 0.65       | 0.000667* |
| SST Hot                  | 0.94     | 0.43       | 0.013446* |
| Variance                 | 0.38     |            |           |
| Variance Error           | 0.34     |            |           |

SST = Sea Surface Temperature

\*Statistically significant (P<0.05)



**Table S20** Factors associated with *Lutzomyia trapidoi* abundance in Panamá Este. For the analysis, we employed a log transformed linear mixed effects model (LMM). In the table, the p-values are based on a Chi square test.

| Facotors                | Estimate | Std. Error | P        |
|-------------------------|----------|------------|----------|
| Intercept               | -0.25    | 0.89       | >0.05    |
| Environment Perdomicile | -0.62    | 0.64       | 0.49     |
| Month Feb.              | 1.00     | 0.72       | 0.12     |
| Month Jan.              | 1.34     | 0.94       | 0.12     |
| Month Mar.              | 0.09     | 0.89       | 0.12     |
| Month Sep.              | 1.04     | 0.90       | 0.12     |
| SST Hot                 | 0.92     | 0.63       | 0.01946* |
| SST Normal              | 2.89     | 1.34       | 0.01946* |
| Variance                | 0.52     |            |          |
| Variance Error          | 0.74     |            |          |

SST = Sea Surface Temperature

\*Statistically significant (P<0.05)

**Table S21** Factors associated with *Lutzomya gomezi* abundance in Panamá Oeste. For the analysis, we employed a log transformed linear mixed effects model (LMM). In the table, the p-values are based on a Chi square test.

| Facotors                 | Estimate | Std. Error | P         |
|--------------------------|----------|------------|-----------|
| Intercept                | 1.80     | 0.35       | <0.05*    |
| Environment Forest       | 1.11     | 0.33       | 0.07      |
| Environment Peridomicile | 1.25     | 0.29       | 0.07      |
| Quarter Fourth           | 1.65     | 0.22       | 0.009501* |
| Quarter Second           | 1.31     | 0.36       | 0.009501* |
| Quarter Third            | 1.10     | 0.22       | 0.009501* |
| SST Hot                  | 2.43     | 0.26       | 0.007886* |
| SST Normal               | 2.62     | 0.35       | 0.007886* |
| Variance                 | 0.40     |            |           |
| Variance Error           | 0.70     |            |           |

SST = Sea Surface Temperature

\*Statistically significant (P<0.05)

**Table S22** Factors associated with *Lutzomyia panamensis* abundance in Panamá Oeste. For the analysis, we employed a log transformed linear mixed effects model (LMM). In the table, the p-values are based on a Chi square test.

| Facotors                 | Estimate | Std. Error | P         |
|--------------------------|----------|------------|-----------|
| Intercept                | -0.84    | 0.70       | >0.05     |
| Environment Forest       | 0.06     | 0.41       | 0.10      |
| Environment Peridomicile | -0.28    | 0.37       | 0.10      |
| Month Aug.               | 2.53     | 1.29       | <0.0001*  |
| Month Dec.               | 1.39     | 0.83       | <0.0001*  |
| Month Feb.               | 1.75     | 0.63       | <0.0001*  |
| Month Jan.               | 0.81     | 0.64       | <0.0001*  |
| Month Jul.               | 1.06     | 0.67       | <0.0001*  |
| Month Jun.               | -0.39    | 0.80       | <0.0001*  |
| Month Mar.               | -0.03    | 0.66       | <0.0001*  |
| Month May                | -0.94    | 0.71       | <0.0001*  |
| Month Nov.               | 2.07     | 0.63       | <0.0001*  |
| Month Oct.               | 1.73     | 0.60       | <0.0001*  |
| Month Sep.               | 1.37     | 0.63       | <0.0001*  |
| SST Hot                  | -0.39    | 0.42       | 0.003923* |
| SST Normal               | 1.08     | 0.60       | 0.003923* |
| Variance                 | 0.45     |            |           |
| Variance Error           | 1.32     |            |           |

SST = Sea Surface Temperature

\*Statistically significant (P<0.05)

**Table S23** Factors associated with *Lutzomyia trapidoi* abundance in Panamá Oeste. For the analysis, we employed a log transformed linear mixed effects model (LMM). In the table, the p-values are based on a Chi square test.

| Facotors                | Estimate | Std. Error | P        |
|-------------------------|----------|------------|----------|
| Intercept               | 0.26     | 0.54       | >0.05    |
| Environment Forest      | -0.06    | 0.34       | 0.43     |
| Environment Perdomicile | -0.07    | 0.29       | 0.43     |
| Month Aug.              | 0.10     | 0.96       | <0.0001* |
| Month Dec.              | 2.61     | 0.61       | <0.0001* |
| Month Feb.              | 1.97     | 0.45       | <0.0001* |
| Month Jan.              | 2.08     | 0.47       | <0.0001* |
| Month Jul.              | 0.87     | 0.49       | <0.0001* |
| Month Jun.              | 0.74     | 0.52       | <0.0001* |
| Month Mar.              | 0.88     | 0.47       | <0.0001* |
| Month May               | -0.28    | 0.37       | <0.0001* |
| Month Nov.              | 1.97     | 0.49       | <0.0001* |
| Month Oct.              | 1.69     | 0.45       | <0.0001* |
| Month Sep.              | 1.26     | 0.46       | <0.0001* |
| SST Hot                 | 0.20     | 0.33       | 0.46     |
| SST Normal              | 0.74     | 0.43       | 0.46     |
| Variance                | 0.54     |            |          |
| Variance Error          | 0.78     |            |          |

SST = Sea Surface Temperature

\*Statistically significant (P<0.05)

**Table S24** Factors associated with *Lutzomyia gomezi* abundance in Veraguas. For the analysis, we employed a linear model (LM). In the table the p-values are based on a t-test.

| Facotors           | Estimate | Std. Error | t-value | Pr(> t ) |
|--------------------|----------|------------|---------|----------|
| Intercept          | 1.50     | 0.63       | 2.37    | 0.0339 * |
| Season Rainy       | 0.12     | 0.61       | -2.26   | 0.0420 * |
| SST Hot            | 2.08     | 0.34       | 1.68    | 0.12     |
| Multiple R-squared | 0.52     |            |         |          |

SST = Sea Surface Temperature

\*Statistically significant (P<0.05)

**Table S25** Factors associated with *Lutzomyia panamensis* abundance in Veraguas. For the analysis, we employed a log transformed linear mixed effects model (LMM). In the table, the p-values are based on a Chi square test.

| Facotors       | Estimate | Std. Error | P        |
|----------------|----------|------------|----------|
| Intercept      | 0.00     | 0.64       | >0.05    |
| Quarter Fourth | 1.29     | 0.74       | 0.03594* |
| Quarter Second | 0.27     | 0.71       | 0.03594* |
| Variance       | 0.12     |            |          |
| Variance Error | 0.29     |            |          |

SST = Sea Surface Temperature

\*Statistically significant (P<0.05)
